# Supplementary material for: Cytoplasmic Injection of Zygotes to Genome Edit Naturally Occurring Sequence Variants Into Bovine Embryos
Source: PubMed Central journal article supplement (PMC9310181; doi:10.3389/fgene.2022.925913), 2022-07-11
Supplement: DataSheet2.pdf [file DataSheet2.pdf]

|                      |     |     |     |     |     |     |            |     |     |     |            |            |     |     |     |     |
|----------------------|-----|-----|-----|-----|-----|-----|------------|-----|-----|-----|------------|------------|-----|-----|-----|-----|
| <b>PRLR, wt</b>      | 430 | AGA | TAT | TCT | TAC | CAC | AAC        | ATT | GCT | GAC | GTG        | <b>TGT</b> | GAG | CTG | GCC | 443 |
|                      |     | R   | Y   | S   | Y   | H   | N          | I   | A   | D   | V          | C          | E   | L   | A   |     |
| <b>PRLR, p.C440*</b> | 430 | AGA | TAT | TCT | TAC | CAC | AAC        | ATT | GCT | GAC | GTG        | <b>TGA</b> | GAG | CTG | GCC | 440 |
|                      |     | R   | Y   | S   | Y   | H   | N          | I   | A   | D   | V          | *          |     |     |     |     |
| <b>PRLR, wt</b>      | 456 | CAA | ACA | GAC | CAA | CAT | <u>GCT</u> | TTA | AAA | GCC | <b>TCA</b> | AAA        | ACC | ATT | GAA | 456 |
|                      |     | Q   | T   | D   | Q   | H   | <b>A</b>   | L   | K   | A   | S          | K          | T   | I   | E   |     |
| <b>PRLR, p.L462*</b> | 456 | CAA | ACA | GAC | CAA | CAT | GTT        | TAA | AAG | CCT | CAA        | AAA        | CCA | TTG | AAA | 456 |
|                      |     | Q   | T   | D   | Q   | H   | <b>V</b>   | *   |     |     |            |            |     |     |     |     |
| <b>PRLR, p.S465*</b> | 456 | CAA | ACA | GAC | CAA | CAT | GCT        | TTA | AAA | GCC | <b>TAA</b> | AAA        | ACC | ATT | GAA | 465 |
|                      |     | Q   | T   | D   | Q   | H   | A          | L   | K   | A   | *          |            |     |     |     |     |

**Supplementary Figure 2.** Sequence of wt and HDR-edited alleles. Nucleotide and amino acid sequences of relevant regions are shown for the wt allele and alleles with edited p.C440\*, p.L462\* and p.S465\* mutations. Numbers refer to amino acid sequence positions in *PRLR*. Gene sequence changes are indicated in bold, the nucleotide deleted in the p.L462\* edited allele is underlined. Premature stop codons and the amino acid change (A to V in pL462\*) are in bold.
